# Supplementary material
Source: publisher figshare collection journal article supplement (https://acs.figshare.com/ndownloader/files/13852871)
Supplement: Supplementary file 1 [file 13852871]

# Analysis of polyphenols in Lamiaceae family by MSPD extraction followed by UHPLC-MS/MS determination

*Maria Chiara Simeoni<sup>a‡</sup>, Marika Pellegrini<sup>a‡</sup>, Manuel Sergi<sup>a\*</sup>, Paola Pittia<sup>a</sup>, Antonella Ricci<sup>a</sup>  
and Dario Compagnone<sup>a</sup>*

<sup>a</sup> University of Teramo, Faculty of Bioscience and Technologies for Food, Agriculture and Environment, Via Renato Balzarini, 1, 64100, Teramo, Italy.

KEYWORDS: extraction/isolation; Lamiaceae; matrix effect; MSPD; polyphenolic compounds; UHPLC-MS/MS;

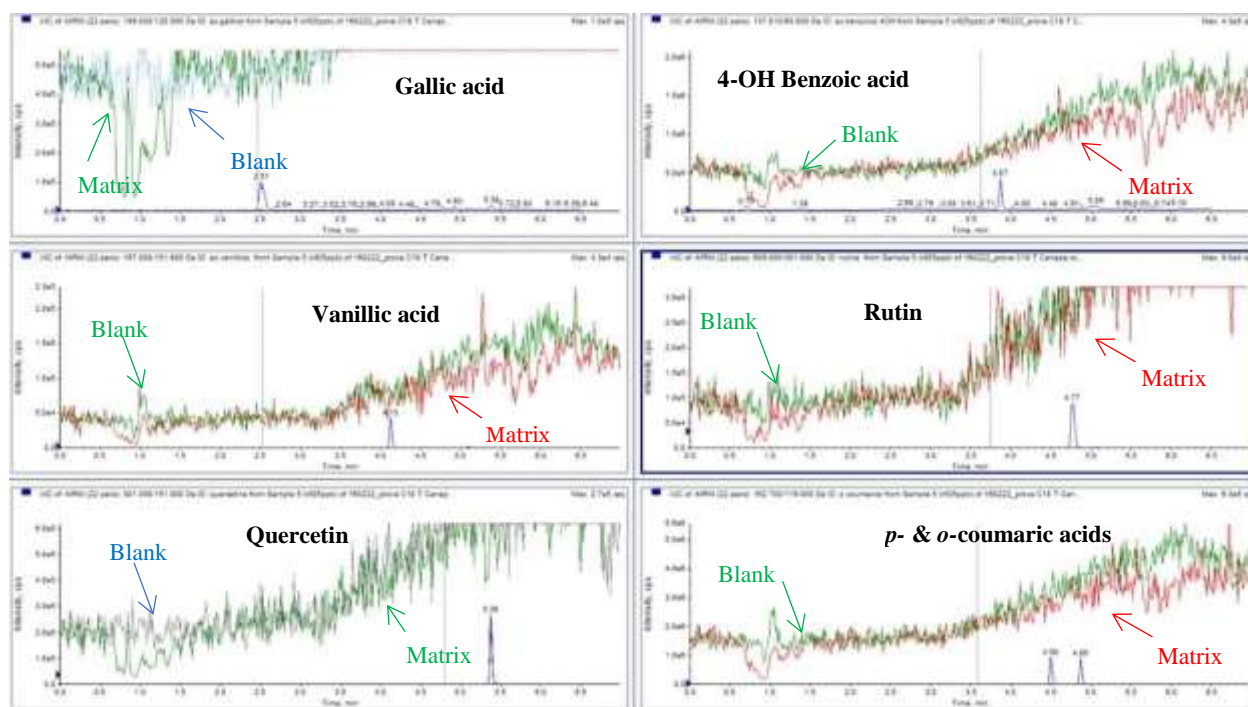

**Figure S1** - Extracted ion currents (XICs) of blank, *Ocimum basilicum* L. matrix and phenolic compounds
